# Supplementary material for: Copper(ii) tetrafluoroborate complexes with the N3,N4-bridging coordination of 1-(tert-butyl)-1H-tetrazole: synthesis, crystal structure and magnetic properties
Source: Royal Society of Chemistry journal article supplement (doi:10.1039/c5dt02871j), 2015-01-01
Supplement: c5dt02871j1.pdf [file c5dt02871j1.pdf]

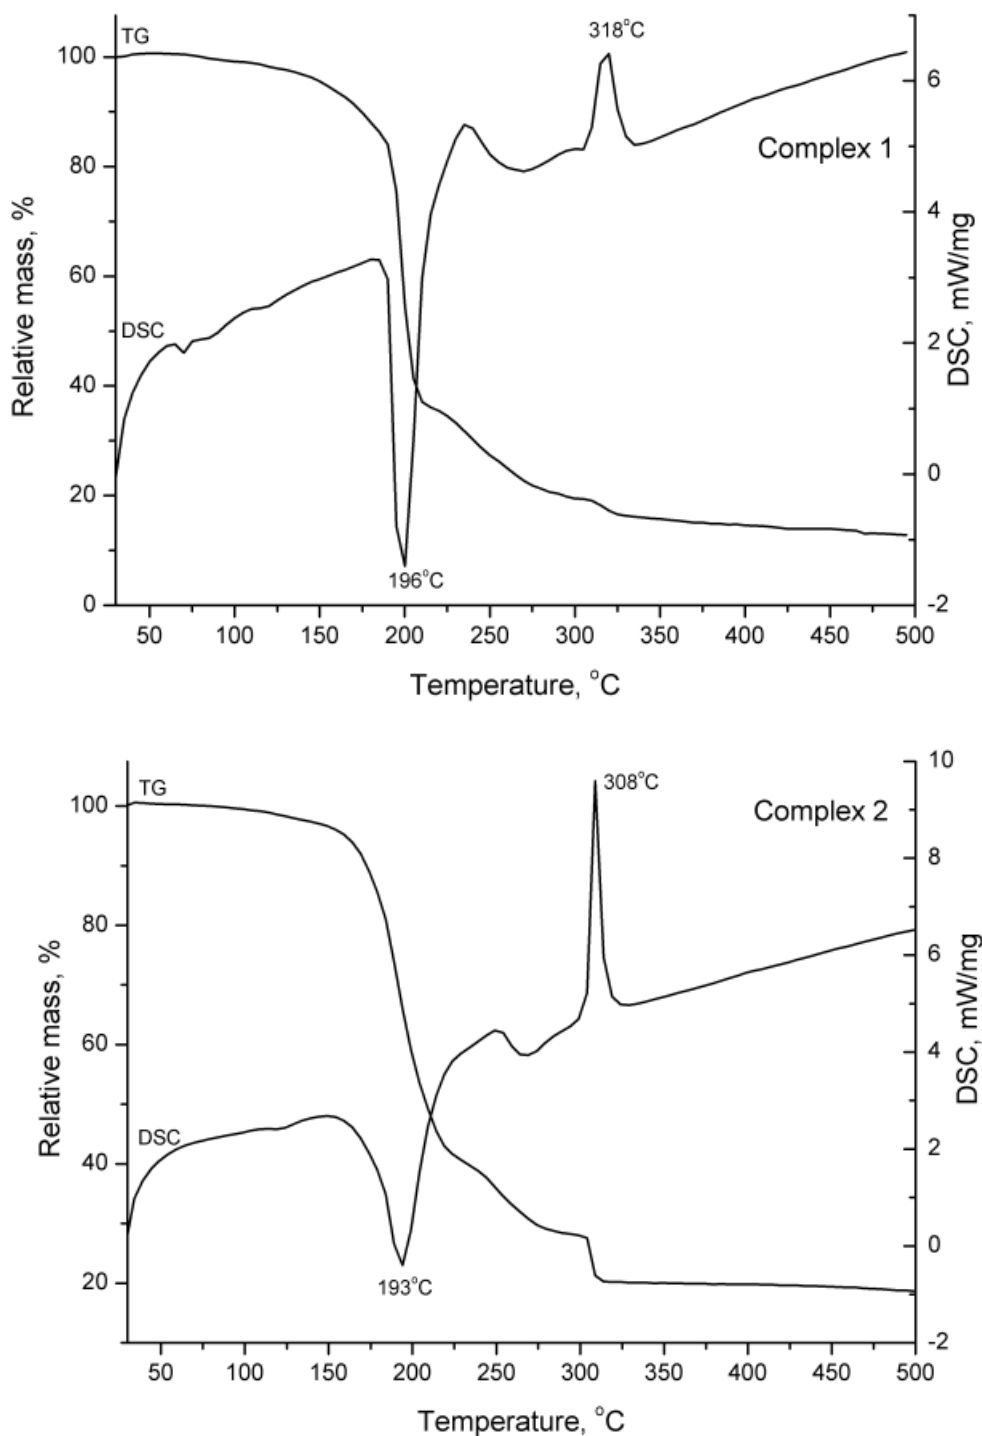

**Figure S1.** TG and DSC curves of complexes **1** (top) and **2** (bottom).

Complexes investigated show similar thermal behaviour. Their noticeable weight loss starts at about 150 °C. The first decomposition step for **1** and **2** is characterized by the endothermic peak at 196 and 193 °C, correspondingly. Further heating is accompanied by exothermic peak at 318 (**1**) and 308 °C (**2**).

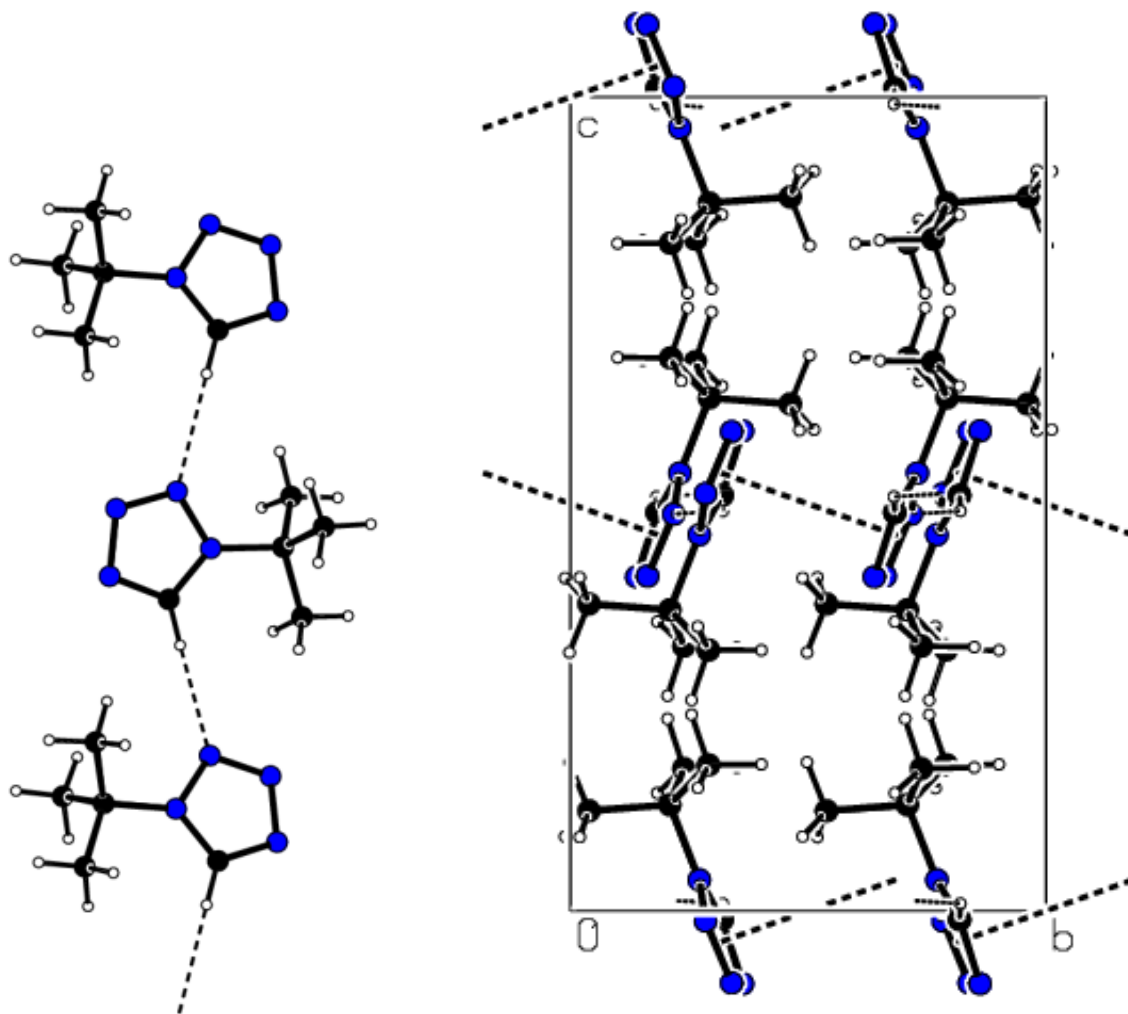

**Figure S2.** A hydrogen-bonded polymeric chain extending along the *a* axis in the crystal structure of 1-*tert*-Butyltetrazole (on the left), and crystall packing of 1-*tert*-Butyltetrazole viewed along the *a* axis, with dashed lines showing  $\pi \cdots \pi$  interactions between the tetrazole rings (on the right).

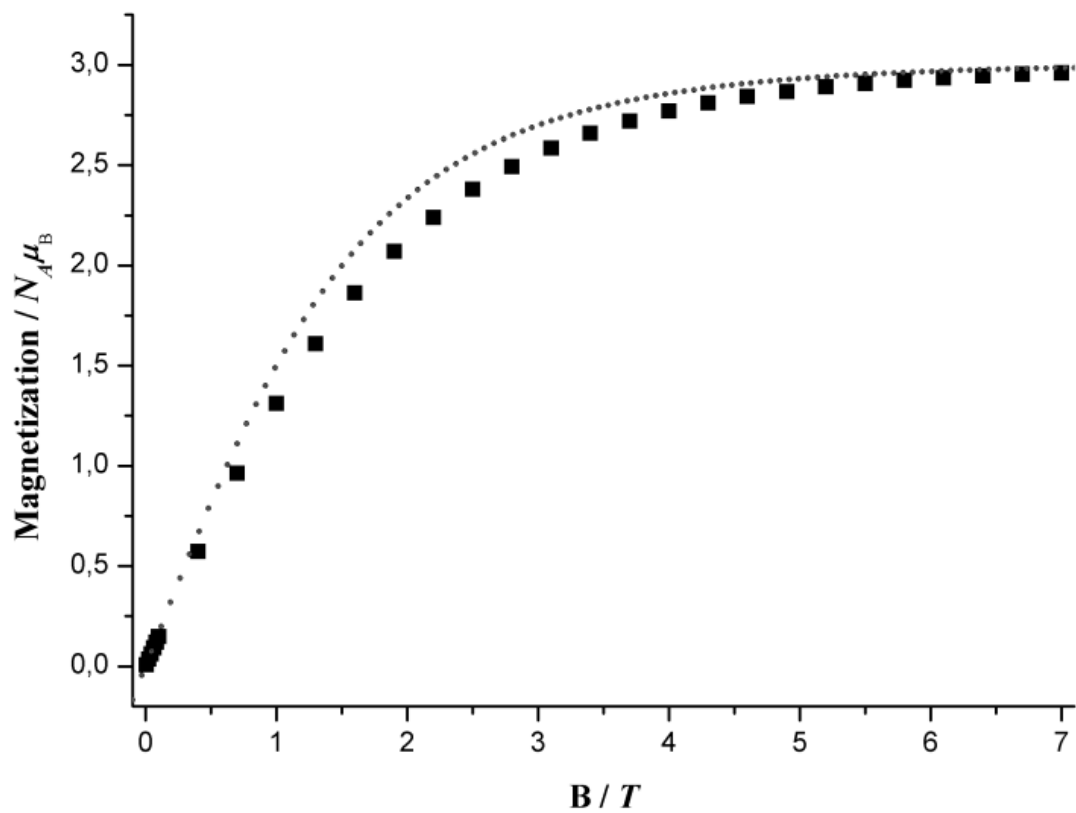

**Figure S3.** Field dependence of the magnetization of complex **2** as measured (square) and as calculated (dotted).

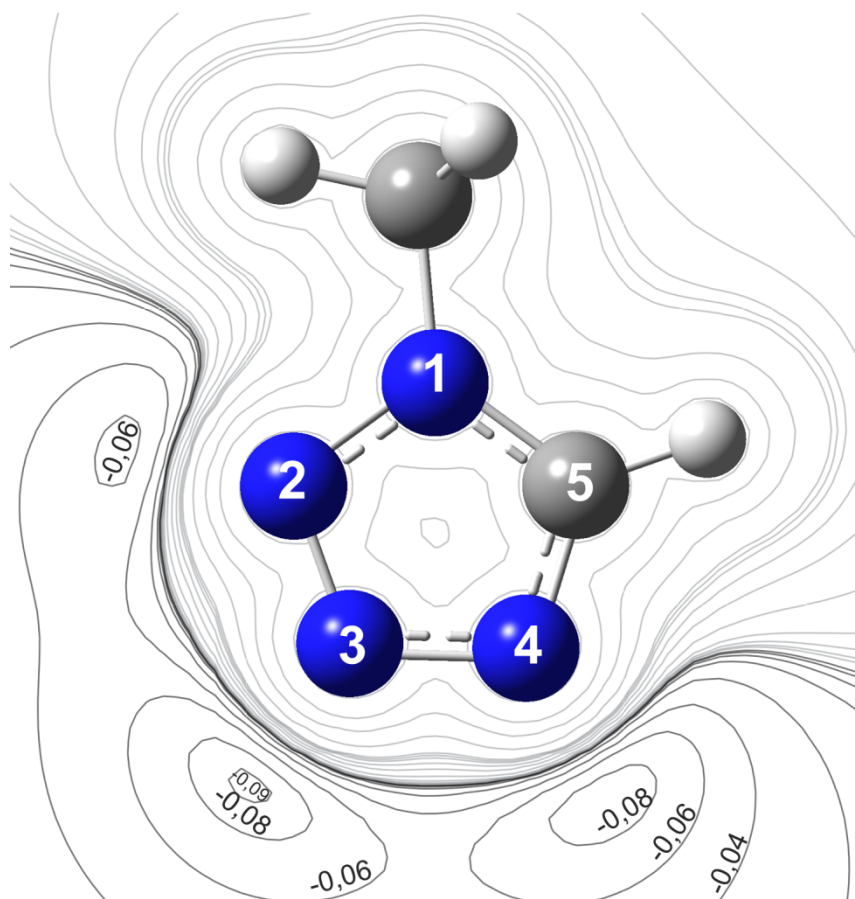

**Figure S4.** B3LYP/6-311+G(d,p)//B3LYP/6-31G(d) calculated MESP contour map for 1-methyltetrazole. One hydrogen atom is not shown for clarity.

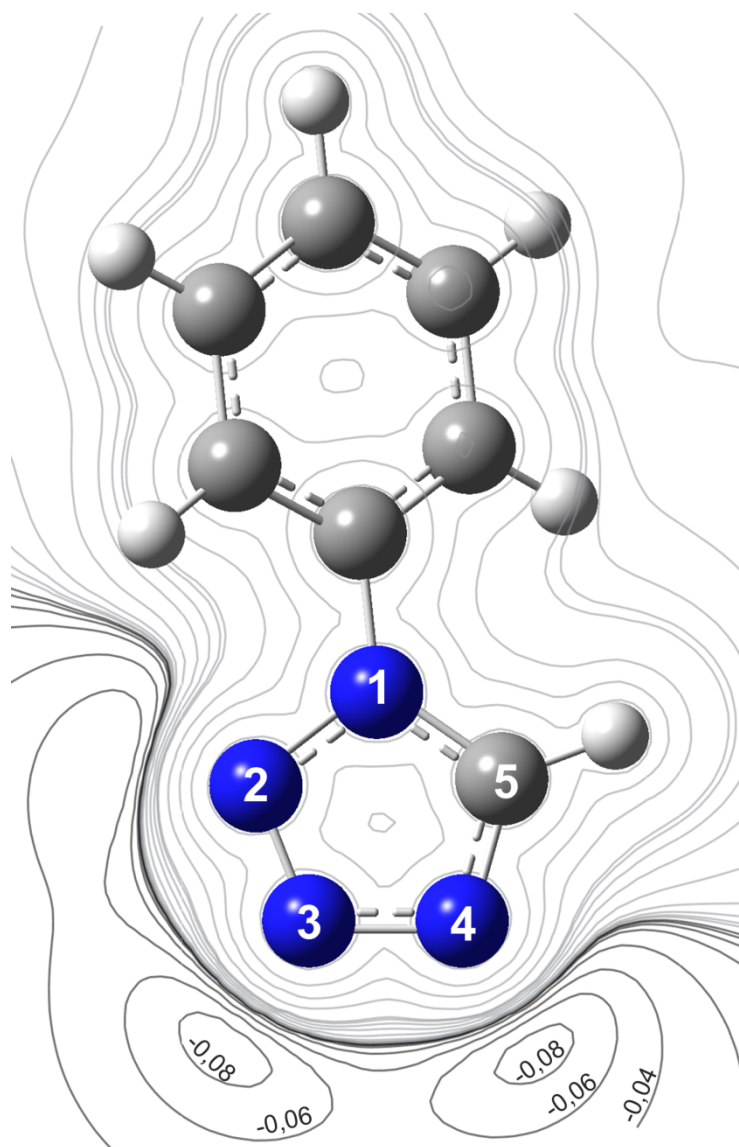

**Figure S5.** B3LYP/6-311+G(d,p)//B3LYP/6-31G(d) calculated MESP contour map for 1-phenyltetrazole.

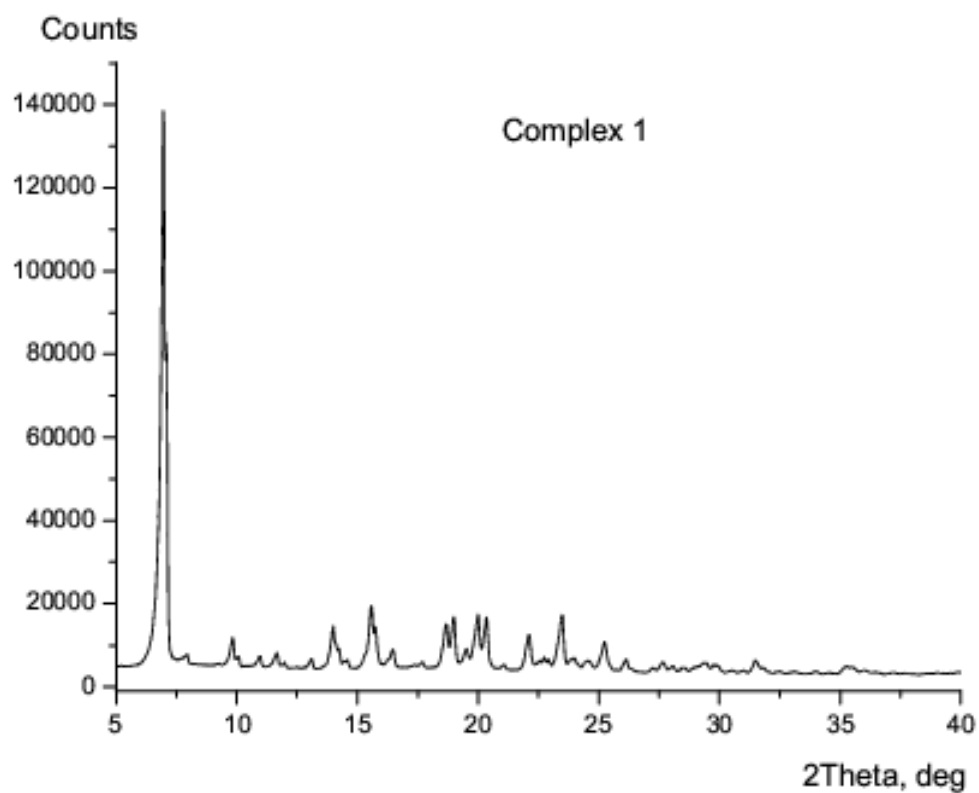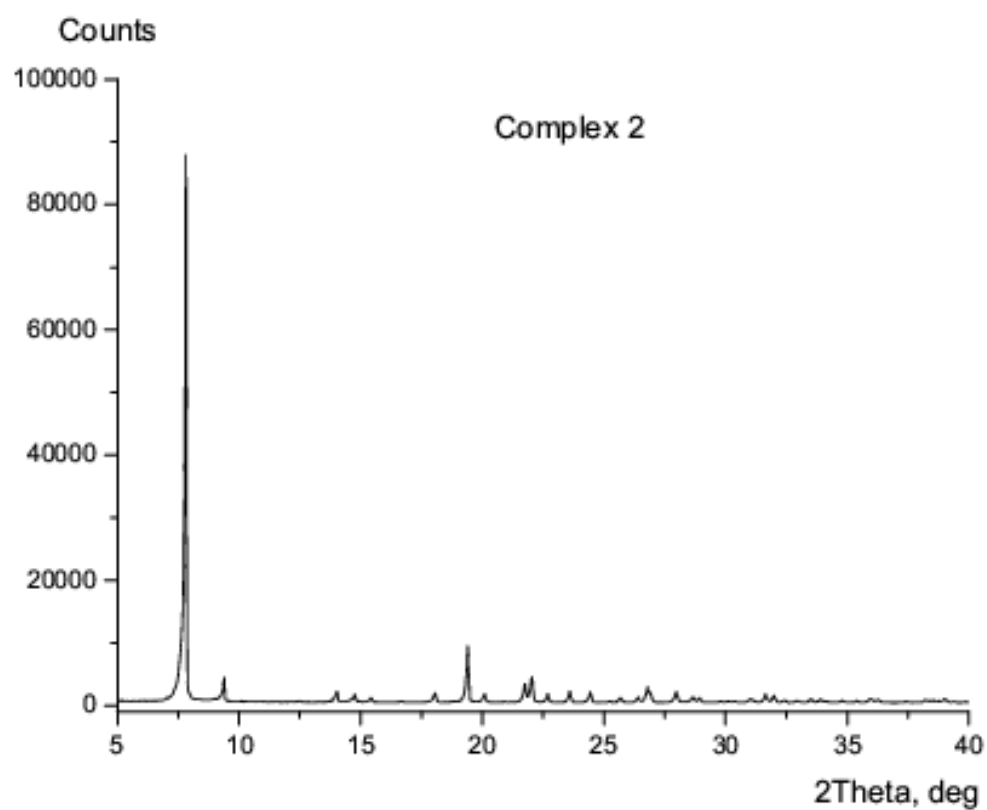

**Figure S6.** X-ray powder diffraction patterns of complexes **1** (top) and **2** (bottom) registered at 296 K using CuK $\alpha$  radiation.
